# Supplementary material
Source: publisher site journal article supplement (https://www.dovepress.com/article/177901)
Supplement: Supplementary file 1 [file get_supplementary_file.php]

**Supplementary Table 2: Immunogenicity score of the 9 mer MHC class I peptides from early and late proteins of HPV45**

| <b>S.No.</b> | <b>Peptides</b> | <b>Score</b> |
|--------------|-----------------|--------------|
| <b>E11</b>   | DATHCWTY        | 0.24182      |
| <b>2</b>     | ATHTCWTYF       | 0.23617      |
| <b>3</b>     | CTDWVMAIF       | 0.21577      |
| <b>4</b>     | SSLAALYWY       | 0.18973      |
| <b>5</b>     | FTFPHAFPF       | 0.18749      |
| <b>6</b>     | FTDLVRNFK       | 0.1479       |
| <b>7</b>     | VLILALLRY       | 0.08058      |
| <b>8</b>     | FKDIYGLSF       | 0.0634       |
| <b>9</b>     | MLAVFKDIY       | 0.06172      |
| <b>10</b>    | YLESRVTVF       | 0.01217      |
| <b>11</b>    | LSDMVQWAF       | -0.02854     |
| <b>12</b>    | TLIKPATLY       | -0.12149     |
| <b>13</b>    | MNMSQWIKY       | -0.14144     |
| <b>14</b>    | LTDESDMAF       | -0.15761     |
| <b>15</b>    | ATDTGSDMV       | -0.16035     |
| <b>16</b>    | LRSSLAALY       | -0.1676      |
| <b>17</b>    | LADTKVAML       | -0.19446     |
|              |                 |              |
| <b>E21</b>   | MTETGIWEK       | 0.47528      |
| <b>2</b>     | NSNTWEVQY       | 0.31407      |
| <b>3</b>     | NTGILTVTY       | 0.22818      |
| <b>4</b>     | CVSYWGVYY       | 0.22286      |
| <b>5</b>     | YVWVDSIYY       | 0.21232      |
| <b>6</b>     | YIKDGDTTY       | 0.06164      |
| <b>7</b>     | TSDDTVSAT       | -0.01058     |
| <b>8</b>     | LTVTYNSEV       | -0.03835     |
| <b>9</b>     | NTHVHNSLL       | -0.06865     |
| <b>10</b>    | NSVQISVGY       | -0.07465     |
| <b>11</b>    | RLRKYADHY       | -0.12935     |
| <b>12</b>    | NTEPSQCFK       | -0.2259      |
|              |                 |              |
| <b>E4</b>    | CAVPVTTRY       | 0.14198      |
|              |                 |              |
| <b>E6 1</b>  | YSRIRELRY       | 0.31625      |
| <b>2</b>     | RTEVYQFAF       | 0.08306      |
|              |                 |              |
| <b>L1 1</b>  | HVEEYDLQF       | 0.07349      |
| <b>2</b>     | TLTAEVMSY       | -0.05653     |
| <b>3</b>     | LTAEVMSY        | -0.15127     |
|              |                 |              |
| <b>L2 1</b>  | QYYLWPWYY       | 0.37768      |
| <b>2</b>     | TSAWDVPIY       | 0.36445      |
| <b>3</b>     | QIGGRVHFY       | 0.23006      |
| <b>4</b>     | HSDFMDIIR       | 0.16496      |

|           |           |          |
|-----------|-----------|----------|
| <b>5</b>  | LVTFDNPAY | 0.15941  |
| <b>6</b>  | FSDPSIIEV | 0.13104  |
| <b>7</b>  | STSFTNPAF | 0.10931  |
| <b>8</b>  | PTNAATSTY | -0.00503 |
| <b>9</b>  | KRASATDLY | -0.06689 |
| <b>10</b> | MPSTAASSY | -0.17599 |
| <b>11</b> | STINKSFTY | -0.20756 |
| <b>12</b> | ATDLYKTCK | -0.2093  |
